# Supplementary material
Source: PubMed Central journal article supplement (PMC3289736)

**Supporting Information for**  
**Amsacrine as a Topoisomerase II Poison: Importance of**  
**Drug-DNA Interactions**

**Adam C. Ketron, William A. Denny, David E. Graves, and Neil Osheroff**

CONTENTS

FIGURE S1: DNA intercalation by *m*-AMSA derivatives.

FIGURE S1: DNA intercalation by *m*-AMSA derivatives. The abilities of 0–150  $\mu\text{M}$  1'-OH 3'-OCH<sub>3</sub>, 1'-OH, 1'-OH 2'-OCH<sub>3</sub>, 3-OCH<sub>3</sub>, N-Phenyl, 2'-OCH<sub>3</sub>, and acridine, and 0–15  $\mu\text{M}$  ethidium bromide (EtBr) to intercalate DNA were determined using the topoisomerase I-based supercoiling assay shown in Figure 5. Representative ethidium bromide (EtBr)-stained agarose gels are shown. The effects of 10  $\mu\text{M}$  EtBr and 100  $\mu\text{M}$  etoposide (Etop) are included as positive and negative controls, respectively. Relaxed DNA standards (DNA) also are shown. Results are representative of three independent experiments. Structures of *m*-AMSA derivatives are shown in Figure 1. Concentrations of intercalators required to yield “fully relaxed” (Rel) and “fully supercoiled” (SC) plasmid are given in Table 1.

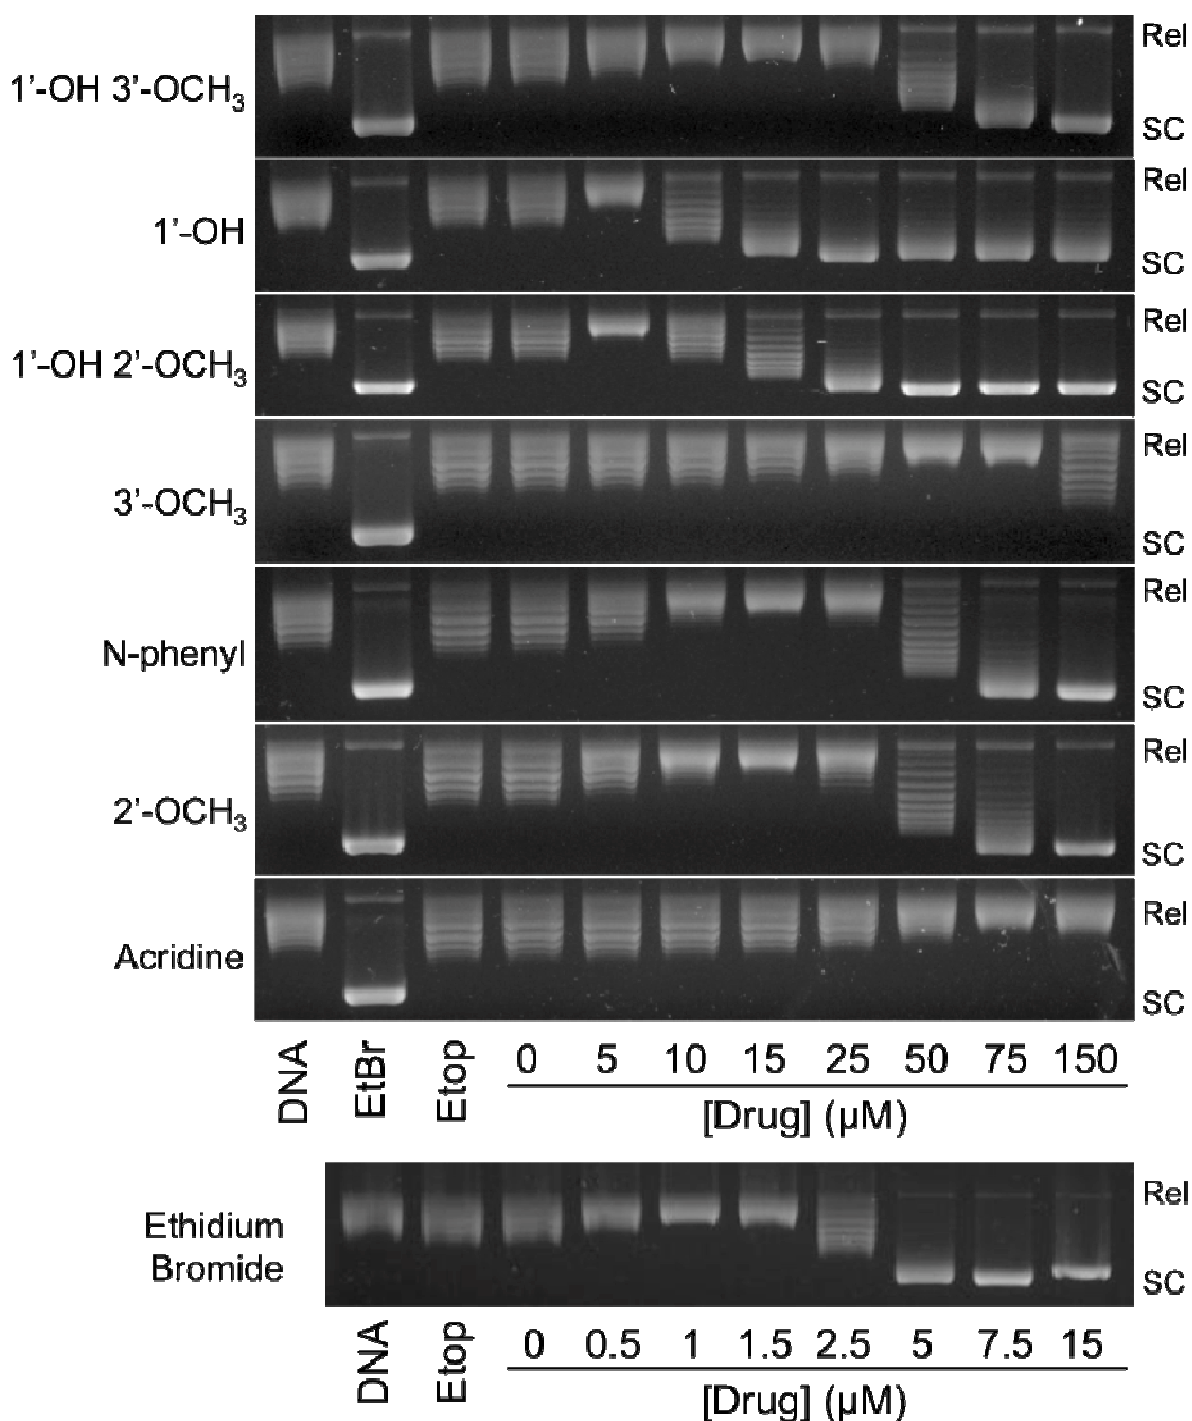

Supplement: NIHMS356840-supplement-1_si_001.pdf [file NIHMS356840-supplement-1_si_001.pdf]
